# Supplementary material
Source: PubMed Central journal article supplement (PMC3613136)
Supplement: NIHMS453565-supplement-1_si_001.pdf [file NIHMS453565-supplement-1_si_001.pdf]

## Supporting Information

### Effects of Imidazole Deprotonation on Vibrational Spectra of High-Spin Iron(II) Porphyrinates

Chuanjiang Hu,<sup>\*,†,‡</sup> Qian Peng,<sup>‡</sup> Nathan J. Silvernail,<sup>‡</sup> Alexander Barabanschikov,<sup>§</sup> Jiyong Zhao,<sup>¶</sup> E. Ercan Alp,<sup>¶</sup> Wolfgang Sturhahn,<sup>¶</sup> J. Timothy Sage,<sup>\*,§</sup> and W. Robert Scheidt<sup>\*,‡</sup>

Contribution from Key Laboratory of Organic Synthesis  
of Jiangsu Province, College of Chemistry, Chemical Engineering  
and Materials Science, Soochow University, Suzhou 215123, P.R. China,  
Department of Chemistry and Biochemistry,  
University of Notre Dame, Notre Dame, Indiana 46556,  
Department of Physics and Center for Interdisciplinary Research on Complex Systems,  
Northeastern University, Boston, Massachusetts 02115,  
and Advanced Photon Source, Argonne National Laboratory, Argonne, Illinois 60439

---

<sup>†</sup>Soochow University

<sup>‡</sup>University of Notre Dame

<sup>§</sup>Northeastern University

<sup>¶</sup>Argonne National Laboratory

\*To whom correspondence should be addressed: E-mail: cjhu@suda.edu.cn (CH), jtsage@neu.edu (JTS), Scheidt.1@nd.edu (WRS)

**[Fe(TPP)(2-MeHIm)]**

**LUMO+1 E= -0.101 Fe-d = 93%**

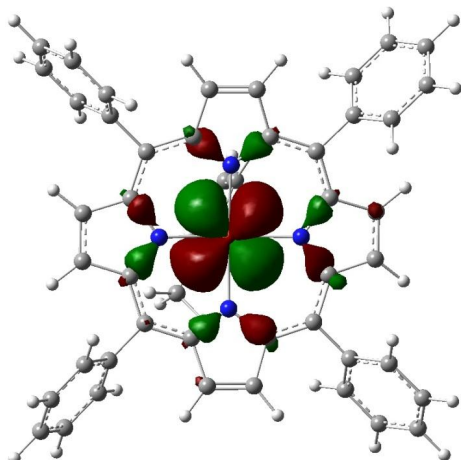

**LUMO E= -0.104 Fe-d = 56%**

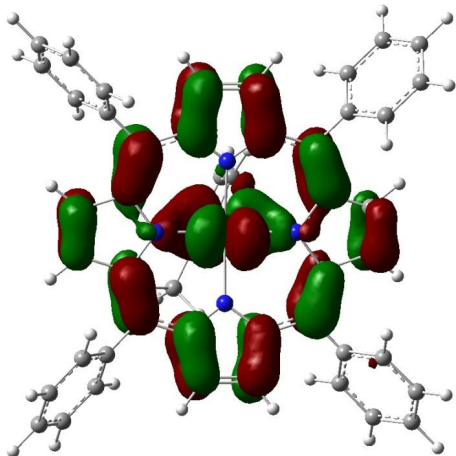

**HOMO E= -0.118 Fe-d = 69%**

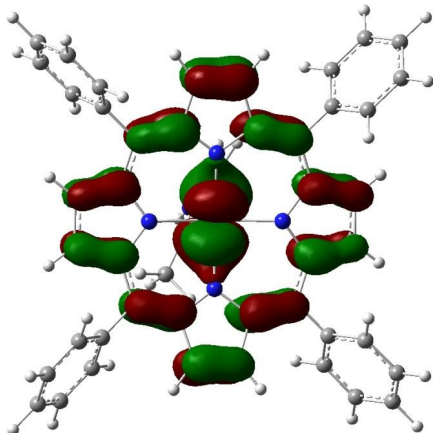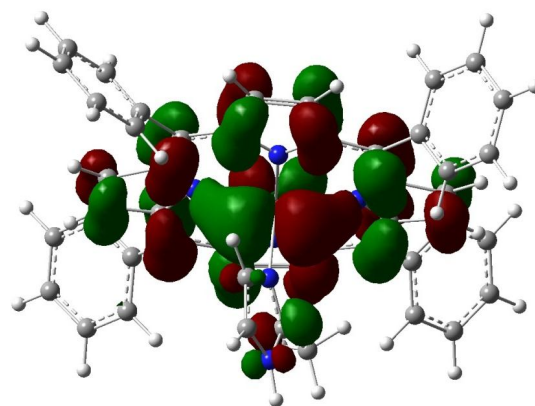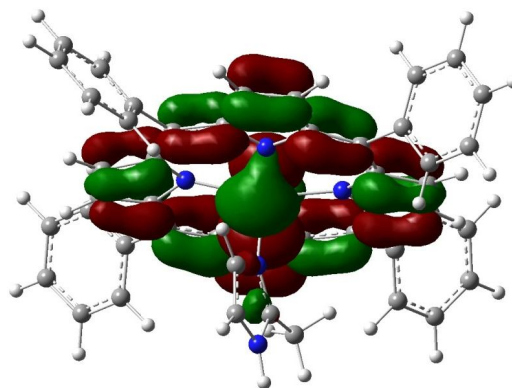

**Figure S1.** Frontier  $\beta$ -MO's for [Fe(TPP)(2-MeHIm)] calculated with BP86/TZVP.

**[Fe(TPP)(2-MeIm)<sup>-</sup>]**

**LUMO+1 E= -0.010 Fe-d = 16%**

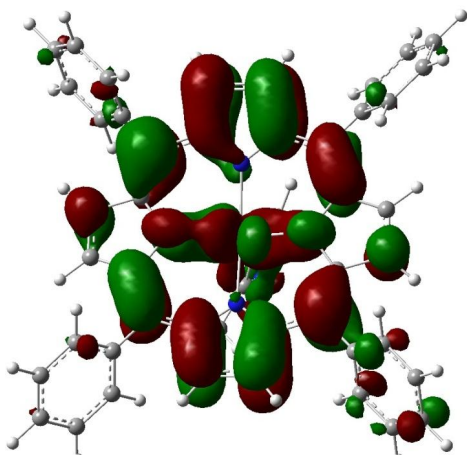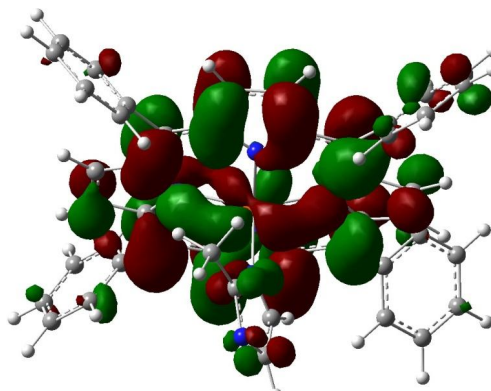

**LUMO E= -0.011 Fe-d = 63%**

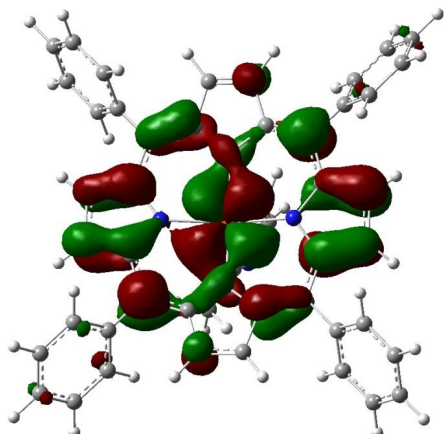

**HOMO E= -0.021 Fe-d = 61%**

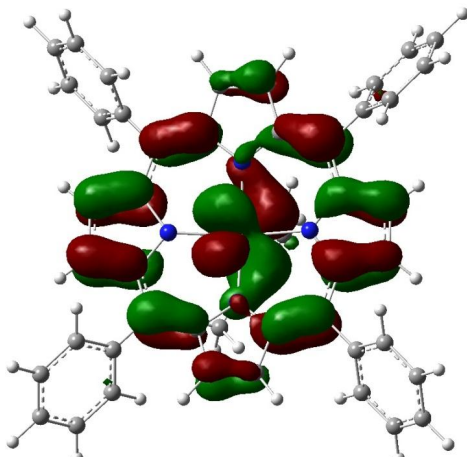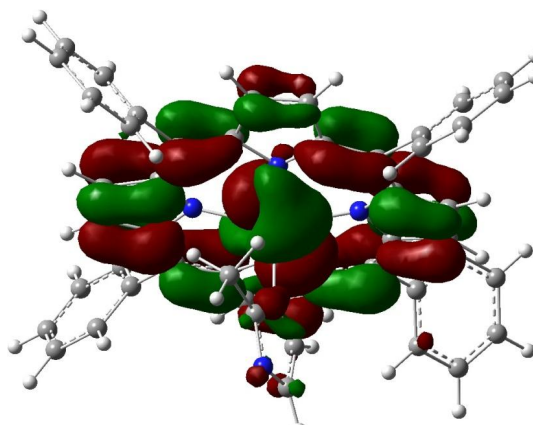

**Figure S2.** Frontier  $\beta$ -MO's for [Fe(TPP)(2-MeIm<sup>-</sup>)]<sup>-</sup> calculated with BP86/TZVP.

**[Fe(OEP)(2-MeHIm)]**

**LUMO+1 E= -0.093 Fe-d = 93%**

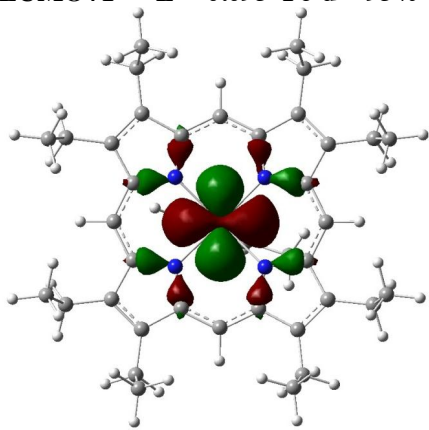

**LUMO E= -0.098 Fe-d = 58%**

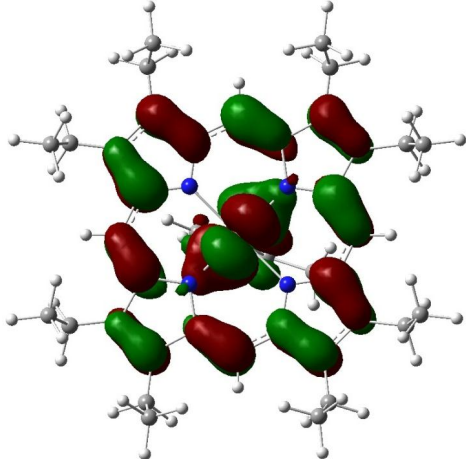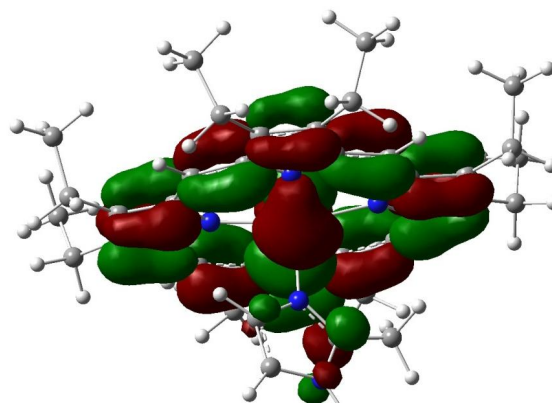

**HOMO E= -0.110 Fe-d = 69%**

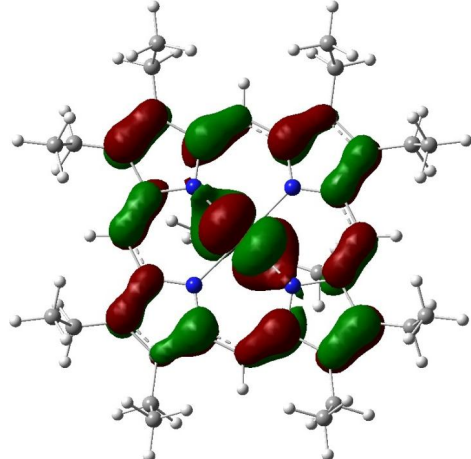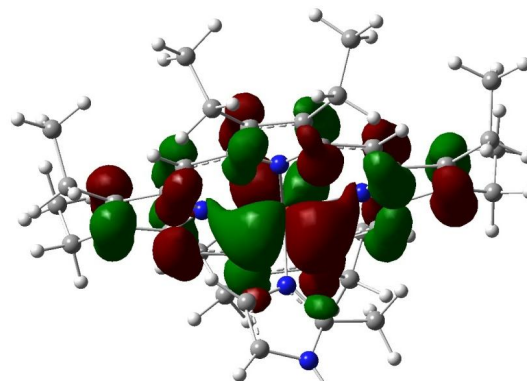

**Figure S3.** Frontier  $\beta$ -MO's for [Fe(OEP)(2-MeHIm)] calculated with BP86/TZVP.

**[Fe(OEP)(2-MeIm)<sup>-</sup>]**

**LUMO+1 E= +0.0027 Fe-d = 27%**

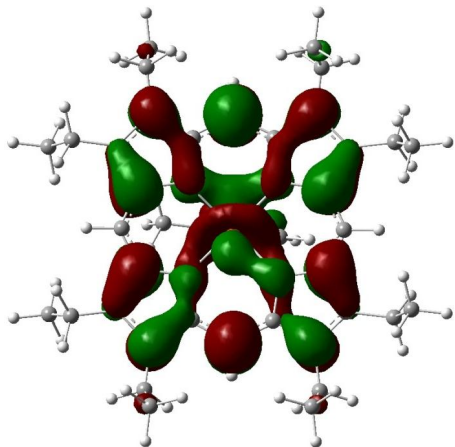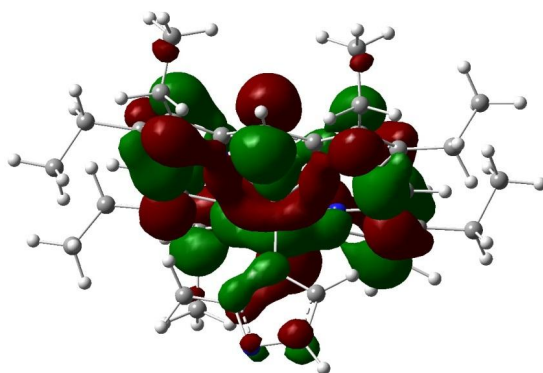

**LUMO E= +0.0025 Fe-d = 49%**

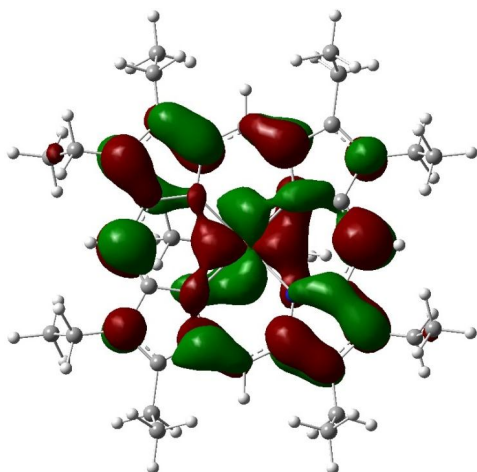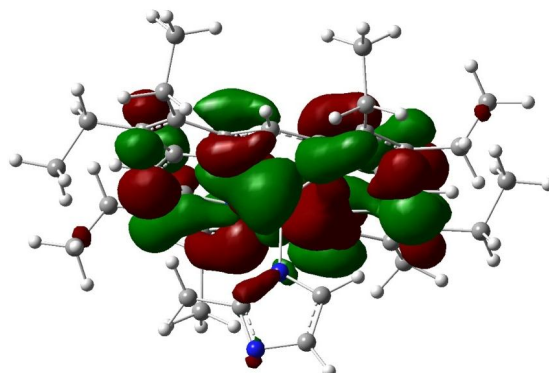

**HOMO E= -0.007 Fe-d = 66%**

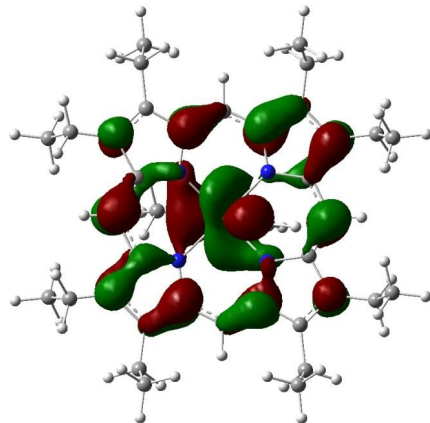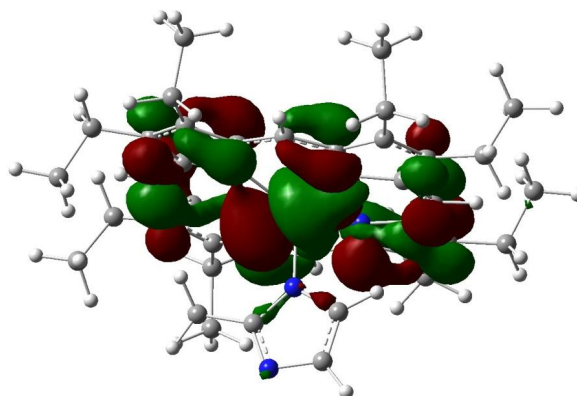

**Figure S4.** Frontier  $\beta$ -MO's for [Fe(OEP)(2-MeIm<sup>-</sup>)]<sup>-</sup> calculated with BP86/TZVP.

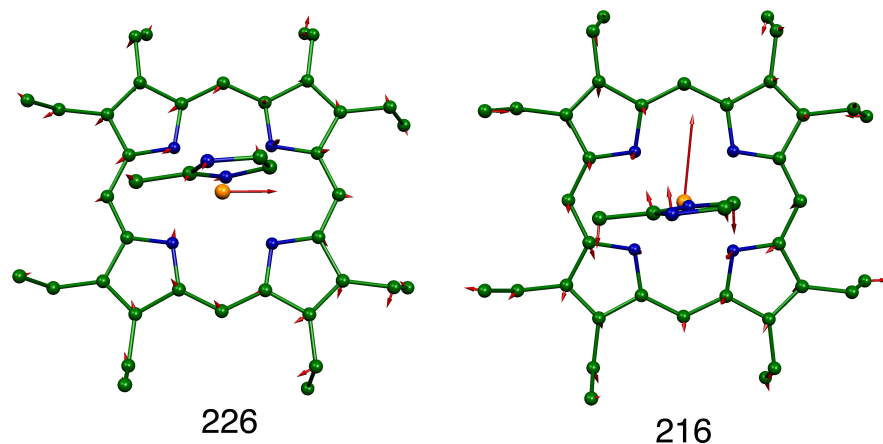

**Figure S5.** Two DFT-predicted in-plane Fe modes contributing to the experimental feature at  $224\text{ cm}^{-1}$  in  $[\text{K}(222)][\text{Fe}(\text{OEP})(2\text{-MeIm}^-)]$ .

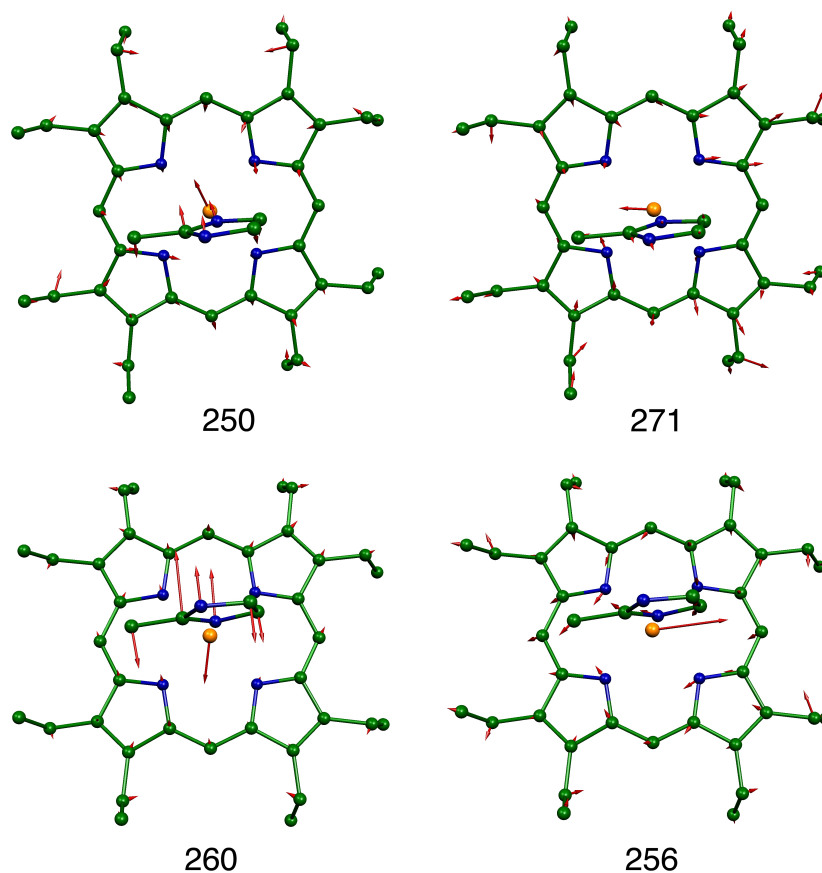

**Figure S6.** Other modes with significant in-plane Fe motion from the BP86 calculations on  $[\text{K}(222)][\text{Fe}(\text{OEP})(2\text{-MeIm}^-)]$  with observed experimental features at  $244$  and  $266\text{ cm}^{-1}$ .

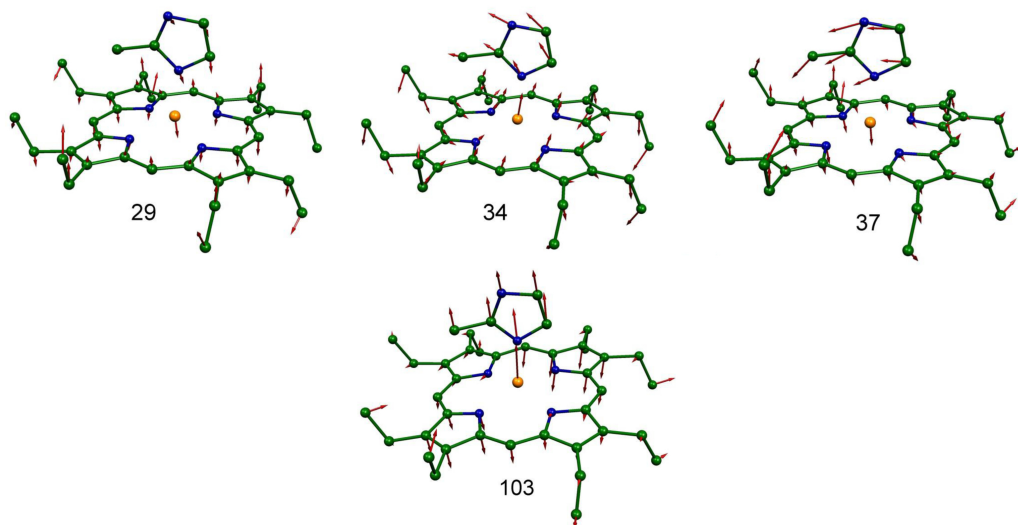

**Figure S7.** The low-frequency out-of-plane Fe modes, predicted at  $103\text{ cm}^{-1}$ , contributing to the experimental feature at  $115$  and  $125\text{ cm}^{-1}$  in  $[\text{K}(222)][\text{Fe}(\text{OEP})(2\text{-MeIm}^-)]$ .

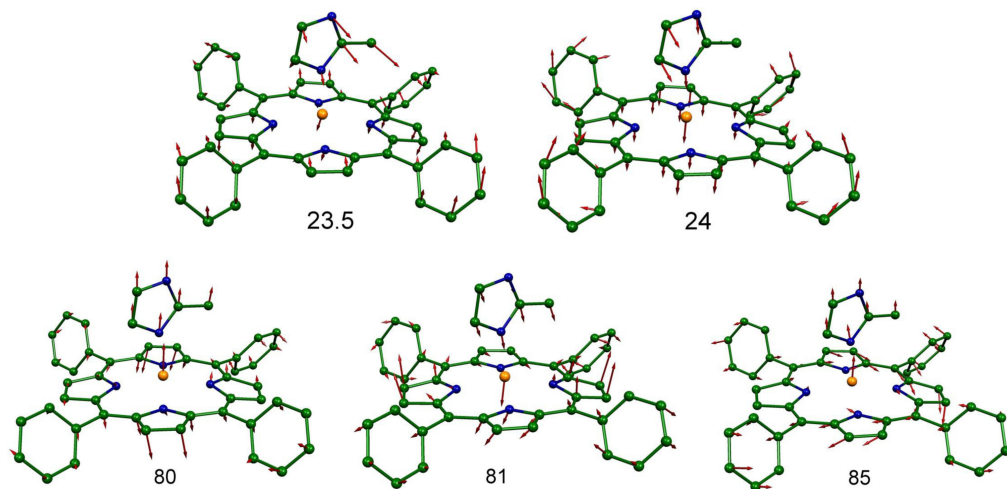

**Figure S8.** The low-frequency out-of-plane Fe modes, predicted at  $80$ ,  $81$ , and  $85\text{ cm}^{-1}$ , contributing to the experimental feature at  $103\text{ cm}^{-1}$  in  $[\text{K}(222)][\text{Fe}(\text{TPP})(2\text{-MeIm}^-)]$ .

**Table S1. Predicted frequencies and  $e^2_{\text{Fe}}$  values for Two Calculated Imidazolate Derivatives.<sup>a</sup>**

| K(222) [Fe(OEP)(2MeIm)] |                   |                   |                      | K(222) [Fe(TPP)(2MeIm)] |                   |                   |                      |
|-------------------------|-------------------|-------------------|----------------------|-------------------------|-------------------|-------------------|----------------------|
| frequency               | $e^2_{\text{IP}}$ | $e^2_{\text{OP}}$ | $e^2_{\text{total}}$ | frequency               | $e^2_{\text{IP}}$ | $e^2_{\text{OP}}$ | $e^2_{\text{total}}$ |
| 29.1                    | 0.001             | 0.026             | 0.027                | 21.3                    | 0.002             | 0.008             | 0.009                |
| 34.4                    | 0.001             | 0.059             | 0.059                | 23.5                    | 0.000             | 0.019             | 0.020                |
| 36.6                    | 0.001             | 0.028             | 0.028                | 24.2                    | 0.000             | 0.038             | 0.038                |
| 102.2                   | 0.002             | 0.017             | 0.020                | 50.6                    | 0.012             | 0.001             | 0.013                |
| 103.1                   | 0.003             | 0.120             | 0.123                | 52.5                    | 0.015             | 0.000             | 0.015                |
| 115.5                   | 0.014             | 0.001             | 0.015                | 53.7                    | 0.011             | 0.000             | 0.011                |
| 128.6                   | 0.032             | 0.020             | 0.052                | 79.7                    | 0.000             | 0.094             | 0.094                |
| 132.5                   | 0.006             | 0.005             | 0.010                | 80.5                    | 0.001             | 0.050             | 0.050                |
| 154.5                   | 0.030             | 0.002             | 0.032                | 85.0                    | 0.000             | 0.048             | 0.048                |
| 158.1                   | 0.038             | 0.002             | 0.040                | 114.4                   | 0.017             | 0.000             | 0.017                |
| 175.4                   | 0.012             | 0.000             | 0.012                | 131.5                   | 0.042             | 0.009             | 0.051                |
| 185.5                   | 0.056             | 0.000             | 0.057                | 161.1                   | 0.010             | 0.002             | 0.012                |
| 192.0                   | 0.012             | 0.000             | 0.012                | 163.8                   | 0.003             | 0.010             | 0.014                |
| 193.7                   | 0.017             | 0.000             | 0.017                | 176.9                   | 0.101             | 0.006             | 0.107                |
| 197.8                   | 0.011             | 0.000             | 0.011                | 201.2                   | 0.032             | 0.005             | 0.038                |
| 200.8                   | 0.012             | 0.000             | 0.012                | 206.9                   | 0.107             | 0.010             | 0.117                |
| 203.6                   | 0.010             | 0.000             | 0.010                | 209.7                   | 0.301             | 0.025             | 0.326                |
| 207.1                   | 0.036             | 0.001             | 0.037                | 211.9                   | 0.312             | 0.034             | 0.346                |
| 211.9                   | 0.081             | 0.000             | 0.081                | 214.6                   | 0.073             | 0.002             | 0.075                |
| 216.0                   | 0.358             | 0.003             | 0.361                | 218.5                   | 0.132             | 0.001             | 0.134                |
| 219.6                   | 0.041             | 0.006             | 0.047                | 225.3                   | 0.059             | 0.009             | 0.068                |
| 226.0                   | 0.229             | 0.008             | 0.237                | 229.9                   | 0.033             | 0.006             | 0.039                |
| 233.0                   | 0.059             | 0.001             | 0.060                | 241.6                   | 0.003             | 0.032             | 0.035                |
| 242.6                   | 0.007             | 0.007             | 0.014                | 257.7                   | 0.036             | 0.097             | 0.133                |
| 247.7                   | 0.085             | 0.324             | 0.409                | 259.6                   | 0.017             | 0.347             | 0.364                |
| 250.0                   | 0.092             | 0.023             | 0.115                | 271.6                   | 0.226             | 0.029             | 0.255                |
| 255.9                   | 0.262             | 0.119             | 0.381                | 273.7                   | 0.187             | 0.000             | 0.187                |
| 259.6                   | 0.099             | 0.019             | 0.119                | 381.1                   | 0.002             | 0.015             | 0.017                |
| 264.2                   | 0.010             | 0.075             | 0.084                | 389.5                   | 0.022             | 0.000             | 0.022                |
| 270.6                   | 0.059             | 0.000             | 0.059                | 391.6                   | 0.024             | 0.000             | 0.024                |
| 280.5                   | 0.010             | 0.001             | 0.011                | 427.6                   | 0.011             | 0.001             | 0.011                |
| 299.0                   | 0.010             | 0.001             | 0.011                |                         |                   |                   |                      |
| 325.2                   | 0.011             | 0.002             | 0.013                |                         |                   |                   |                      |
| 338.1                   | 0.006             | 0.005             | 0.011                |                         |                   |                   |                      |

**a. All predicted frequencies are expressed in  $\text{cm}^{-1}$**



**Table S2. Cartesian coordinates of the calculated structures and energies**

| [Fe(OEP)(2MeIm)] <sup>-</sup> |           |           |           | [Fe(TPP)(2MeIm)] <sup>-</sup> |           |           |           |
|-------------------------------|-----------|-----------|-----------|-------------------------------|-----------|-----------|-----------|
| Fe                            | 0.015199  | -0.015002 | 0.222481  | Fe                            | 0.012942  | -0.009073 | 0.134660  |
| N                             | -1.705727 | -1.013176 | -0.519914 | N                             | -0.771678 | -1.904087 | -0.332700 |
| N                             | -0.967490 | 1.785192  | -0.404225 | N                             | -1.891498 | 0.802550  | -0.274134 |
| N                             | 1.822469  | 1.062364  | 0.027436  | N                             | 0.802674  | 1.909415  | -0.415252 |
| N                             | 1.100735  | -1.779455 | -0.169842 | N                             | 1.929150  | -0.765265 | -0.362955 |
| C                             | -1.844349 | -2.388712 | -0.600771 | C                             | 1.188393  | -0.002446 | 4.180886  |
| C                             | -2.946284 | -0.480576 | -0.804437 | H                             | 1.905661  | 0.041685  | 5.004590  |
| C                             | -2.311598 | 1.948129  | -0.671693 | N                             | 0.191918  | -0.041734 | 2.171232  |
| C                             | -0.431536 | 3.057330  | -0.314363 | N                             | -0.173485 | -0.117031 | 4.423795  |
| C                             | 1.985313  | 2.432636  | 0.018470  | C                             | -0.728540 | -0.135849 | 3.198194  |
| C                             | 3.087351  | 0.516755  | 0.119650  | C                             | 1.422595  | 0.038501  | 2.817348  |
| C                             | 2.465970  | -1.927020 | -0.050320 | H                             | 2.348925  | 0.127687  | 2.249149  |
| C                             | 0.576853  | -3.044771 | -0.326481 | C                             | -2.210094 | -0.254145 | 2.982687  |
| C                             | -3.233131 | -2.740989 | -0.903159 | H                             | -2.698509 | -0.372483 | 3.964281  |
| C                             | -3.920597 | -1.548185 | -1.040775 | H                             | -2.470091 | -1.125241 | 2.352292  |
| C                             | -2.648586 | 3.365833  | -0.747481 | H                             | -2.632029 | 0.639200  | 2.484398  |
| C                             | -1.470323 | 4.060063  | -0.515905 | C                             | -3.191469 | -1.323506 | -0.479640 |
| C                             | 3.401766  | 2.777891  | 0.134229  | C                             | -1.321678 | 3.223907  | -0.325138 |
| C                             | 4.092785  | 1.580285  | 0.201596  | C                             | 3.238318  | 1.344141  | -0.463832 |
| C                             | 2.829060  | -3.338766 | -0.126285 | C                             | 1.359192  | -3.196027 | -0.340333 |
| C                             | 1.641861  | -4.038986 | -0.303211 | C                             | -0.058948 | -3.090883 | -0.319941 |
| C                             | -3.225111 | 0.892492  | -0.864036 | C                             | -2.110460 | -2.247625 | -0.403976 |
| H                             | -4.259899 | 1.176128  | -1.086653 | C                             | -3.065344 | 0.085891  | -0.466156 |
| C                             | 0.930385  | 3.348004  | -0.100955 | C                             | -2.227740 | 2.141774  | -0.399118 |
| H                             | 1.196991  | 4.410549  | -0.056609 | C                             | 0.095288  | 3.095325  | -0.287996 |
| C                             | 3.374652  | -0.859183 | 0.105178  | C                             | 2.144012  | 2.250922  | -0.370356 |
| H                             | 4.432270  | -1.134048 | 0.192578  | C                             | 3.117116  | -0.063690 | -0.489347 |
| C                             | -0.795526 | -3.314905 | -0.491415 | C                             | 2.264042  | -2.112323 | -0.407346 |
| H                             | -1.071415 | -4.371280 | -0.591217 | C                             | -0.972203 | -4.211637 | -0.364602 |
| C                             | -3.772816 | -4.142669 | -1.018623 | H                             | -0.684387 | -5.263049 | -0.366707 |
| H                             | -3.064293 | -4.773278 | -1.592121 | C                             | -2.246366 | -3.688939 | -0.406623 |
| H                             | -4.711724 | -4.131616 | -1.606459 | H                             | -3.188543 | -4.236396 | -0.428881 |
| C                             | -4.043699 | -4.811342 | 0.349383  | C                             | -4.167227 | 1.004711  | -0.715282 |
| H                             | -3.122089 | -4.853984 | 0.955695  | H                             | -5.195119 | 0.711762  | -0.929204 |
| H                             | -4.425213 | -5.842341 | 0.223029  | C                             | -3.650042 | 2.272588  | -0.674004 |
| H                             | -4.789228 | -4.235022 | 0.925507  | H                             | -4.172834 | 3.212151  | -0.854579 |
| C                             | -5.380542 | -1.340445 | -1.349922 | C                             | 1.013822  | 4.203291  | -0.128967 |
| H                             | -5.787140 | -2.239505 | -1.853564 | H                             | 0.729249  | 5.243655  | 0.028093  |
| H                             | -5.494821 | -0.509469 | -2.074588 | C                             | 2.284816  | 3.680684  | -0.184946 |
| C                             | -6.237670 | -1.034870 | -0.098981 | H                             | 3.229226  | 4.216131  | -0.087904 |
| H                             | -6.195885 | -1.873254 | 0.618787  | C                             | 4.229867  | -0.993133 | -0.627888 |
| H                             | -7.296818 | -0.863451 | -0.369925 | H                             | 5.273105  | -0.712654 | -0.773702 |
| H                             | -5.862767 | -0.137079 | 0.422480  | C                             | 3.706125  | -2.256090 | -0.550281 |
| C                             | -4.024378 | 3.932030  | -0.991898 | H                             | 4.243628  | -3.203205 | -0.597245 |
| H                             | -4.543920 | 3.339983  | -1.771645 | C                             | -4.571276 | -1.889266 | -0.622080 |
| H                             | -3.938783 | 4.957428  | -1.401528 | C                             | -5.557537 | -1.649092 | 0.362886  |
| C                             | -4.904327 | 3.970080  | 0.279598  | H                             | -5.289903 | -1.052003 | 1.241441  |
| H                             | -5.022327 | 2.958349  | 0.705364  | C                             | -6.853314 | -2.172346 | 0.231289  |
| H                             | -5.910942 | 4.374599  | 0.060586  | H                             | -7.598455 | -1.977365 | 1.012057  |

|    |                |           |           |    |                |           |           |
|----|----------------|-----------|-----------|----|----------------|-----------|-----------|
| H  | -4.439484      | 4.601273  | 1.057851  | C  | -7.192844      | -2.949785 | -0.888461 |
| C  | -1.262827      | 5.553726  | -0.533021 | H  | -8.204754      | -3.359695 | -0.991188 |
| H  | -0.548978      | 5.845586  | 0.262208  | C  | -6.224215      | -3.197933 | -1.875653 |
| H  | -2.213516      | 6.063862  | -0.284097 | H  | -6.479568      | -3.797334 | -2.758060 |
| C  | -0.748365      | 6.083715  | -1.891831 | C  | -4.929179      | -2.673482 | -1.743651 |
| H  | 0.208905       | 5.603591  | -2.161134 | H  | -4.177737      | -2.859363 | -2.519049 |
| H  | -0.592136      | 7.178988  | -1.864901 | C  | -1.898202      | 4.603753  | -0.313419 |
| H  | -1.469184      | 5.856772  | -2.697761 | C  | -2.806180      | 4.999026  | 0.697398  |
| C  | 3.960033       | 4.177416  | 0.133351  | H  | -3.064392      | 4.280601  | 1.482876  |
| H  | 4.956544       | 4.180729  | 0.617008  | C  | -3.355898      | 6.290161  | 0.710898  |
| H  | 3.320368       | 4.836188  | 0.753681  | H  | -4.050549      | 6.574946  | 1.510360  |
| C  | 4.086538       | 4.790615  | -1.280730 | C  | -3.011145      | 7.217563  | -0.286516 |
| H  | 4.765718       | 4.188018  | -1.910098 | H  | -3.439752      | 8.226873  | -0.275373 |
| H  | 4.480724       | 5.823687  | -1.237301 | C  | -2.111701      | 6.840599  | -1.298159 |
| H  | 3.104426       | 4.815358  | -1.784788 | H  | -1.841357      | 7.553210  | -2.086989 |
| C  | 5.581451       | 1.369246  | 0.298177  | C  | -1.562468      | 5.549488  | -1.311141 |
| H  | 5.796720       | 0.530412  | 0.989624  | H  | -0.870324      | 5.253402  | -2.107080 |
| H  | 6.053557       | 2.262817  | 0.751993  | C  | 4.614604       | 1.928632  | -0.525674 |
| C  | 6.258770       | 1.082619  | -1.062316 | C  | 5.581150       | 1.635747  | 0.465164  |
| H  | 5.824337       | 0.184468  | -1.535642 | H  | 5.301541       | 0.980754  | 1.297455  |
| H  | 7.346801       | 0.919293  | -0.943230 | C  | 6.872167       | 2.182480  | 0.400496  |
| H  | 6.111028       | 1.927095  | -1.759193 | H  | 7.600768       | 1.945366  | 1.185201  |
| C  | 4.230479       | -3.887402 | -0.053817 | C  | 7.227330       | 3.038550  | -0.655283 |
| H  | 4.808993       | -3.339382 | 0.716338  | H  | 8.235554       | 3.466952  | -0.705027 |
| H  | 4.200057       | -4.941394 | 0.286457  | C  | 6.278067       | 3.342801  | -1.645604 |
| C  | 4.994762       | -3.817324 | -1.396664 | H  | 6.544753       | 4.005941  | -2.477647 |
| H  | 4.474076       | -4.404061 | -2.174568 | C  | 4.988050       | 2.794567  | -1.580734 |
| H  | 6.023670       | -4.212564 | -1.296307 | H  | 4.251304       | 3.025628  | -2.358108 |
| H  | 5.058091       | -2.775348 | -1.756999 | C  | 1.930700       | -4.583298 | -0.331057 |
| C  | 1.455748       | -5.525096 | -0.468949 | C  | 1.808075       | -5.399287 | 0.816617  |
| H  | 0.562565       | -5.856893 | 0.096849  | H  | 1.302293       | -4.994158 | 1.699977  |
| H  | 2.314657       | -6.059700 | -0.017757 | C  | 2.331771       | -6.701617 | 0.834021  |
| C  | 1.307032       | -5.969523 | -1.942936 | H  | 2.230312       | -7.314558 | 1.737732  |
| H  | 0.446816       | -5.466383 | -2.418680 | C  | 2.989814       | -7.215622 | -0.295943 |
| H  | 1.155502       | -7.063126 | -2.019902 | H  | 3.400161       | -8.232478 | -0.281842 |
| H  | 2.207765       | -5.704581 | -2.525337 | C  | 3.117172       | -6.416778 | -1.444427 |
| N  | -0.095520      | -0.131235 | 2.263623  | H  | 3.622775       | -6.810091 | -2.334842 |
| C  | -1.151555      | -0.037680 | 3.148366  | C  | 2.590419       | -5.115430 | -1.461971 |
| N  | -0.787428      | -0.165132 | 4.438536  | H  | 2.679974       | -4.496159 | -2.361585 |
| C  | 0.586043       | -0.357883 | 4.388485  | E= | -3441.56086986 | Hartree   |           |
| H  | 1.169514       | -0.494678 | 5.302933  |    |                |           |           |
| C  | 1.017379       | -0.337803 | 3.072616  |    |                |           |           |
| H  | 2.011795       | -0.454881 | 2.639532  |    |                |           |           |
| C  | -2.574671      | 0.182440  | 2.722965  |    |                |           |           |
| H  | -2.968313      | -0.663953 | 2.128596  |    |                |           |           |
| H  | -2.686740      | 1.088382  | 2.099038  |    |                |           |           |
| H  | -3.198764      | 0.294797  | 3.625527  |    |                |           |           |
| E= | -3146.39116338 | Hartree   |           |    |                |           |           |
